# Supplementary material for: Bi-metallic zeolite imidazole framework nanofibers for the selective determination of Cd2+ ions
Source: Royal Society of Chemistry journal article supplement (doi:10.1039/d1tb01170g), 2021-01-01
Supplement: d1tb01170g1.pdf [file d1tb01170g1.pdf]

## **Bi-metallic Zeolite Imidazole Framework Nanofibres for Selective Determination of Cd<sup>2+</sup> ion**

S. Girija <sup>1</sup>¥, S. Sam Sankar <sup>2</sup>¥, T. Thenrajan <sup>1</sup>, Subrata Kundu<sup>2,\*</sup>, and J. Wilson<sup>1,\*</sup>

<sup>1</sup> Department of Bioelectronics and Biosensors, Alagappa University, Karaikudi, Tamil Nadu.

<sup>2</sup> Electrochemical Process Engineering (EPE) Division, CSIR-Central Electrochemical Research Institute (CECRI), Karaikudi, Tamil Nadu.

\*Correspondence should be addressed, E-mail: [kundu.subrata@gmail.com](mailto:kundu.subrata@gmail.com) (S.K);  
[wilson.j2008@yahoo.com](mailto:wilson.j2008@yahoo.com) (J.W).

¥ Both authors are contributed equally.

Phone: (+91) 94882 60016.

**Total no of pages: 5**

**Number of figures: 3**

## **Material preparation**

### **Preparation of Co-ZIF powder.**

For the preparation of Co-ZIF powder, 0.05 M of  $\text{CoCl}_2 \cdot 6\text{H}_2\text{O}$  and 0.8 M of 1-methylbenzimidazole (Me) were prepared using ethanol as a solvent. These two solutions were mixed with the aid of magnetic stirrer at room temperature, and this process is continued for 1 hr, resulted in the formation of blue precipitate of Co-ZIF. Then the blue color precipitate was washed with DI water and ethanol consecutively. The obtained precipitate was kept at 70 °C for 12 h. The resulted Co-ZIF powder was utilized further as a precursor for electrospinning to form continuous microfibers.

### **Preparation of Co-ZIF fibers using electrospinning method.**

For fiber preparation, 2.64 g of Co-ZIF powder was mixed with 1ml of dimethylformamide (DMF) as a solvent and the mixture kept in sonication for 30 min. Later, 0.0875 g of polyacrylonitrile (PAN) was added as polymeric source and stirred for 24 hr. This mixture was utilized as a precursor material for electrospinning and taken in a 2 ml syringe. The electrospinning method was subjected by an applying a DC voltage of 15 kV. The conditions regarding fibers were optimized as follows: the distance between syringe and drum collector was 20 cm, drum collector rotation speed was 165 rpm and the flow rate was 0.15 ml per hour. The as resulted Co-ZIF fibers were dried under ambient condition for 6 hr at and this was denoted as Co-ZIF fibers.

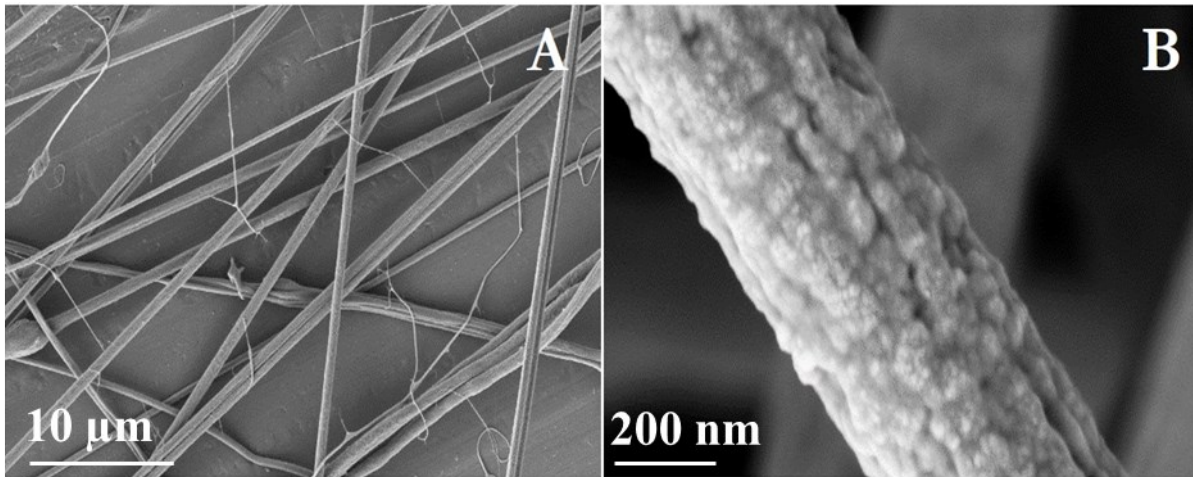

**Figure S1.** Low and high magnified FE-SEM image of Co-ZIF microfiber.

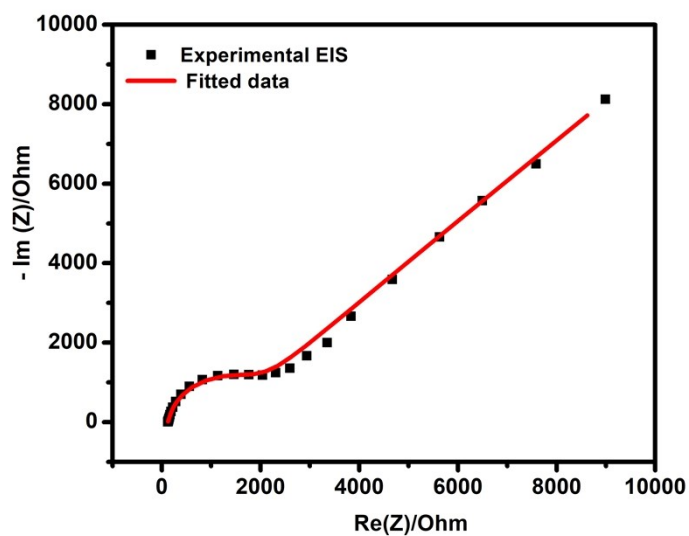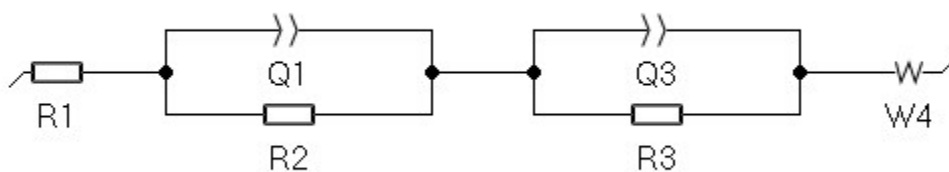

**Figure S2.** EIS fitted data plot for Co/Zn-ZIF NFs modified GCE in 1 mM  $[\text{Fe}(\text{CN})_6]^{3-/4-}$  in 0.1 M KCl at a scan rate  $50 \text{ mV s}^{-1}$  and its equivalent fitted circuit diagram.

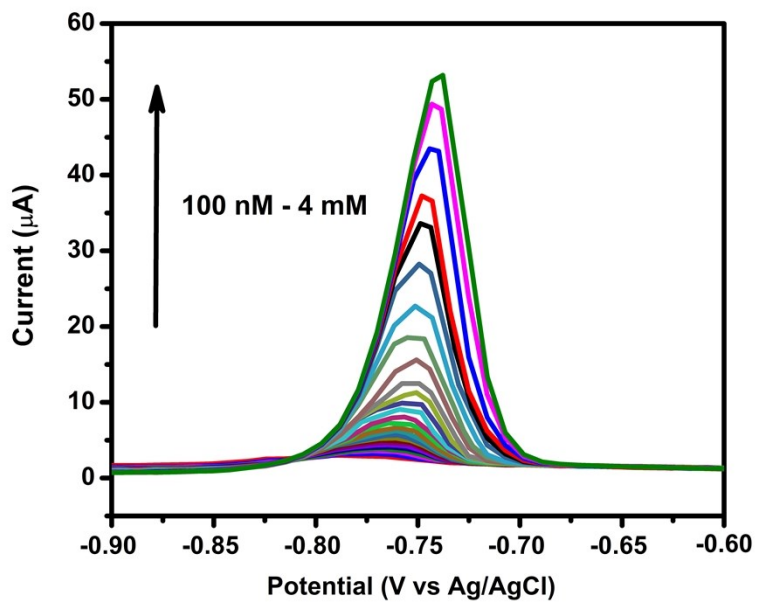

**Figure S3.** Square Wave Voltammetry of Co/Zn-ZIF NFs modified GCE varies from 100 nM-4mM of analyte solution in pH 9.
